# Supplementary material for: Surface Modification of Wood Flour via ARGET ATRP and Its Application as Filler in Thermoplastics
Source: MDPI journal article supplement (doi:10.3390/polym10040354), 2018-03-22
Supplement: s1 [file s1]

Article

# Surface Modification of Wood Flour via ARGET ATRP and Its Application as Filler in Thermoplastics

Martin Kaßel, Julia Gerke, Adrian Ley and Philipp Vana\*

Institute of Physical Chemistry, Georg-August-University Göttingen, Tammannstr. 6, D-37077 Göttingen, Germany

\* Correspondence: pvana@uni-goettingen.de; Tel.: +49-(0)551-39-12753

## Supporting Information:

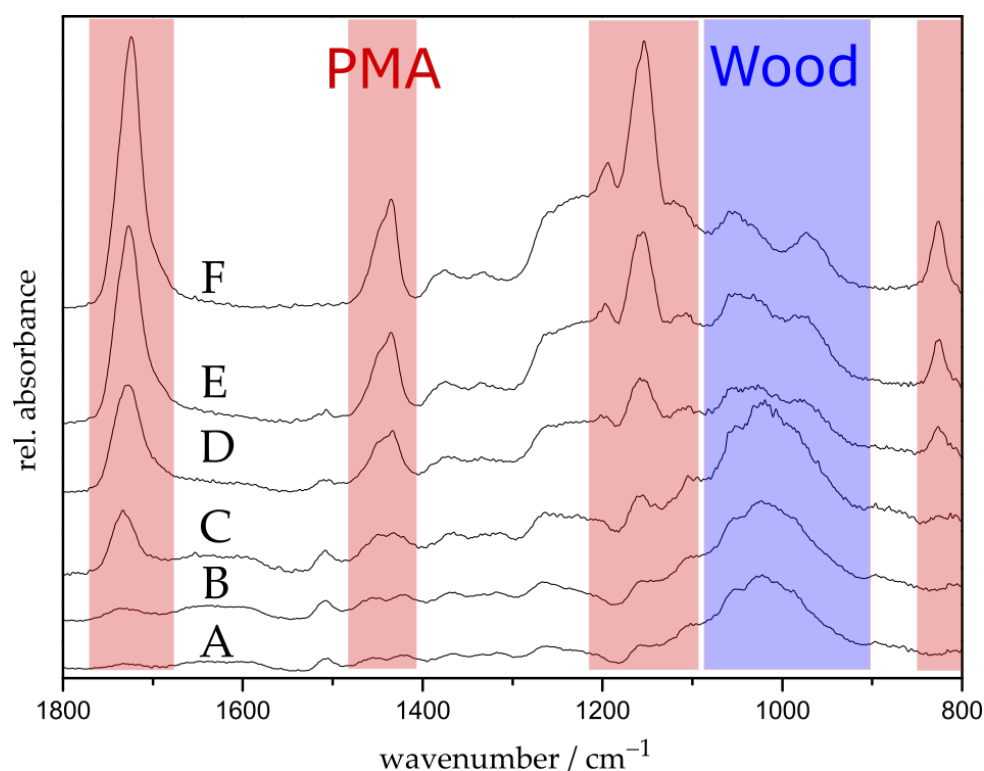

**Figure S1:** FTIR spectra of untreated wood (A), initiator-immobilized wood (B) and PMA-grafted wood with polymerization times of 45 min (C), 2 h (D), 5 h (E) and 9.5 h (F).

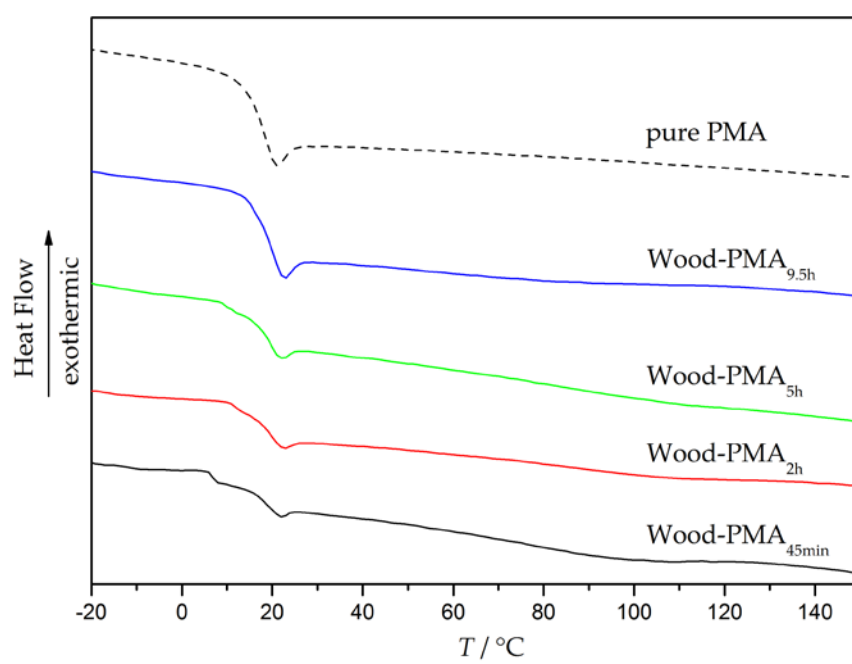

**Figure S2:** DSC curves of PMA-grafted wood and pure PMA. All measured samples showed a glass transition temperature of  $19 \pm 1$   $^\circ\text{C}$ .
